# Supplementary material for: Mycobacterial SigA and SigB Cotranscribe Essential Housekeeping Genes during Exponential Growth
Source: PubMed Central journal article supplement (PMC6529629; doi:10.1128/mbio.00273-19), 2019-05-21

**a**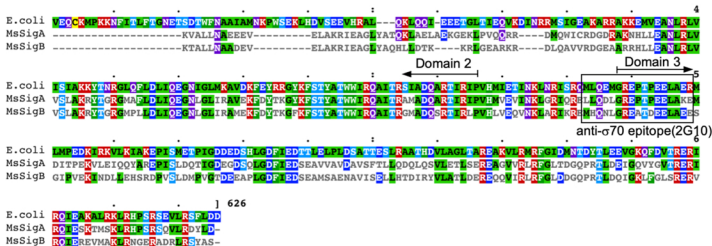**b**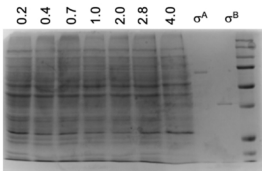

Supplement: mBio.00273-19-sf004.pdf [file mBio.00273-19-sf004.pdf]
